# Supplementary material
Source: PubMed Central journal article supplement (PMC7021716)
Supplement: 41386_2019_570_MOESM2_ESM.pdf [file 41386_2019_570_MOESM2_ESM.pdf]

**Table S1.** Summary of the 10 most frequently failed treatment and augmentation strategies used by study participants during their current depressive episode in order of prevalence of use.

| <b>Failed Treatments</b>  | <b>Failed Additions<sup>a</sup></b> |
|---------------------------|-------------------------------------|
| venlafaxine               | aripiprazole                        |
| desvenlafaxine            | venlafaxine                         |
| escitalopram              | quetiapine                          |
| duloxetine                | lithium                             |
| bupropion                 | bupropion                           |
| mirtazapine               | duloxetine                          |
| electroconvulsive therapy | mirtazapine                         |
| fluoxetine                | trazodone                           |
| vortioxetine              | cognitive behavioural therapy       |
| sertraline                | risperidone                         |

<sup>a</sup>Includes augmentation strategies or additional treatments added to existing medications.
